# Supplementary material
Source: publisher figshare collection journal article supplement (https://karger.figshare.com/ndownloader/files/15471782)
Supplement: Supplementary file 1 [file 15471782]

## Supplementary figure 1

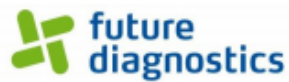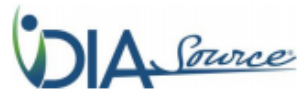

### B. Specificity

Cross reactivity of the antibody used in the Free 25OH Vitamin D ELISA was determined by the supplier as depicted in the table.

| Compound and Concentration                                   | % Cross reaction |
|--------------------------------------------------------------|------------------|
| 25OH-Vitamin D <sub>3</sub> at 10 ng/mL                      | 100              |
| 25OH-Vitamin D <sub>2</sub> at 10 ng/mL                      | 86               |
| 1, 25 (OH) <sub>2</sub> -Vitamin D <sub>3</sub> at 200 ng/mL | 20               |
| 1, 25 (OH) <sub>2</sub> -Vitamin D <sub>2</sub> at 690 ng/mL | 1.9              |
| Vitamin D <sub>3</sub> at 200 ng/mL                          | 2.9              |
| Vitamin D <sub>2</sub> at 200 ng/mL                          | 1.3              |
| 24, 25 (OH) <sub>2</sub> -Vitamin D <sub>3</sub> at 20 ng/mL | >100             |
| 25, 26 (OH) <sub>2</sub> -Vitamin D <sub>3</sub> at 4 ng/mL  | >100             |
| 3 epi 25OH-Vitamin D <sub>3</sub> at 20 µg/mL                | 0.1              |

### C. Intermediate Precision & Repeatability

Intermediate Precision and repeatability is determined based on CLSI EP05-A3.

| Sample | N  | pg/mL |    | Repeatability<br>(within run) | Intermediate<br>Precision (Total) |
|--------|----|-------|----|-------------------------------|-----------------------------------|
| Pool 1 | 80 | 5.8   | SD | 0.29                          | 0.34                              |
|        |    |       | CV | 4.9%                          | 5.9%                              |
| Pool 2 | 80 | 9.6   | SD | 0.53                          | 0.59                              |
|        |    |       | CV | 5.5%                          | 6.1%                              |
| Pool 3 | 80 | 18.4  | SD | 0.35                          | 0.75                              |
|        |    |       | CV | 1.9%                          | 4.0%                              |
| Pool 4 | 80 | 28.1  | SD | 1.26                          | 1.76                              |
|        |    |       | CV | 4.5%                          | 6.3%                              |
